# Supplementary material for: Confidence Intervals for the Difference Between Proportions after Multiple Imputation: A simulation study comparing different strategies
Source: Research Square preprint supplement (doi:10.21203/rs.3.rs-8789678/v1), 2026-02-12
Supplement: Supplementary file 1 [file dcad4383ef50539b5a6d22de.docx]

Supplementary material


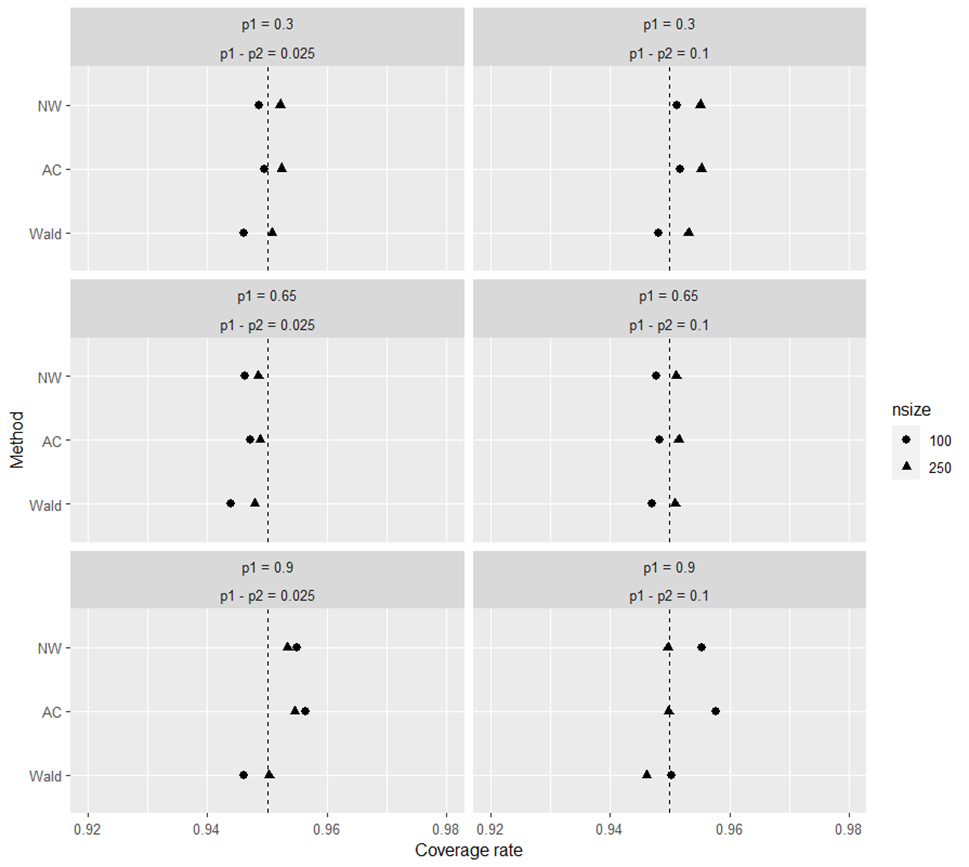


Figure S1. Coveage rate of the confidence intervals for the difference between proportions according to methods Newcombe-Wilson (NW), Agresti-Caffo (AC) and Wald. The dashed line is the desired coverage rate of 0.95.

Table 1. Length of confidence intervals for the difference between proportions of the Wald, Agresti-Caffo and Newcombe-Wilson methods in complete data and after Multiple Imputation of 10% and 30% missing MCAR data.

|  | Wald*a | AC*b | NW*c | MI-Wald†a | MI-AC†b | MI-NW†c |
| --- | --- | --- | --- | --- | --- | --- |
| n100; p1-p2=0.025, 30% missing | | | | | | |
| p1 = 0.3 | 0.249 | 0.248 | 0.247 | 0.264 | 0.262 | 0.261 |
| p1 = 0.65 | 0.265 | 0.263 | 0.261 | 0.281 | 0.278 | 0.276 |
| p1 = 0.9 | 0.173 | 0.177 | 0.180 | 0.184 | 0.187 | 0.192 |
| n250; p1-p2=0.025, 30% missing | | | | | | |
| p1 = 0.3 | 0.158 | 0.158 | 0.158 | 0.168 | 0.167 | 0.167 |
| p1 = 0.65 | 0.168 | 0.168 | 0.167 | 0.178 | 0.178 | 0.177 |
| p1 = 0.9 | 0.110 | 0.111 | 0.112 | 0.117 | 0.118 | 0.119 |
| n100; p1-p2=0.025, 10% missing | | | | | | |
| p1 = 0.3 | 0.249 | 0.248 | 0.247 | 0.305 | 0.302 | 0.301 |
| p1 = 0.65 | 0.265 | 0.263 | 0.261 | 0.324 | 0.320 | 0.317 |
| p1 = 0.9 | 0.174 | 0.177 | 0.180 | 0.215 | 0.216 | 0.227 |
| n250; p1-p2=0.025, 10% missing | | | | | | |
| p1 = 0.3 | 0.158 | 0.158 | 0.158 | 0.194 | 0.193 | 0.193 |
| p1 = 0.65 | 0.168 | 0.168 | 0.167 | 0.206 | 0.205 | 0.204 |
| p1 = 0.9 | 0.110 | 0.111 | 0.112 | 0.136 | 0.136 | 0.139 |
| n100; p1-p2=0.1, 30% missing | | | | | | |
| p1 = 0.3 | 0.237 | 0.236 | 0.236 | 0.251 | 0.250 | 0.250 |
| p1 = 0.65 | 0.269 | 0.266 | 0.264 | 0.285 | 0.282 | 0.280 |
| p1 = 0.9 | 0.194 | 0.196 | 0.198 | 0.206 | 0.208 | 0.211 |
| n250; p1-p2=0.1, 30% missing | | | | | | |
| 16. p1 = 0.3 | 0.150 | 0.150 | 0.150 | 0.160 | 0.159 | 0.159 |
| 17. p1 = 0.65 | 0.171 | 0.170 | 0.169 | 0.181 | 0.180 | 0.179 |
| 18. p1 = 0.9 | 0.124 | 0.124 | 0.124 | 0.131 | 0.131 | 0.132 |
| n100; p1-p2=0.1, 10% missing | | | | | | |
| p1 = 0.3 | 0.237 | 0.236 | 0.236 | 0.290 | 0.288 | 0.289 |
| p1 = 0.65 | 0.269 | 0.266 | 0.264 | 0.328 | 0.324 | 0.321 |
| p1 = 0.9 | 0.194 | 0.196 | 0.198 | 0.239 | 0.239 | 0.247 |
| n250; p1-p2=0.1, 10% missing | | | | | | |
| p1 = 0.3 | 0.150 | 0.150 | 0.150 | 0.184 | 0.184 | 0.184 |
| p1 = 0.65 | 0.171 | 0.170 | 0.169 | 0.209 | 0.208 | 0.207 |
| p1 = 0.9 | 0.124 | 0.124 | 0.125 | 0.152 | 0.152 | 0.154 |

a Wald b Agresti-Caffo c Newcombe-Wilson; * Complete data † Multiple Imputation

Table 2. Length of confidence intervals for the difference between proportions of the Wald, Agresti-Caffo and Newcombe-Wilson methods in complete data and after Multiple Imputation of 10% and 30% missing MAR data when x and Y have a weak correlation.

|  | Wald*a | AC*b | | NW*c | MI-Wald†a | MI-AC†b | MI-NW†c |
| --- | --- | --- | --- | --- | --- | --- | --- |
| n100; p1-p2=0.025, 30% missing | | | | | | | |
| p1 = 0.3 | 0.249 | 0.248 | 0.247 | | 0.265 | 0.263 | 0.262 |
| p1 = 0.65 | 0.265 | 0.263 | 0.261 | | 0.281 | 0.279 | 0.277 |
| p1 = 0.9 | 0.168 | 0.168 | 0.167 | | 0.179 | 0.178 | 0.178 |
| n250; p1-p2=0.025, 30% missing | | | | | | | |
| p1 = 0.3 | 0.158 | 0.158 | 0.158 | | 0.168 | 0.168 | 0.168 |
| p1 = 0.65 | 0.168 | 0.168 | 0.167 | | 0.179 | 0.178 | 0.178 |
| p1 = 0.9 | 0.110 | 0.111 | 0.112 | | 0.118 | 0.119 | 0.120 |
| n100; p1-p2=0.025, 10% missing | | | | | | | |
| 7. p1 = 0.3 | 0.249 | 0.248 | 0.247 | | 0.315 | 0.311 | 0.310 |
| 8. p1 = 0.65 | 0.265 | 0.263 | 0.261 | | 0.332 | 0.328 | 0.325 |
| 9. p1 = 0.9 | 0.168 | 0.168 | 0.167 | | 0.212 | 0.211 | 0.210 |
| n250; p1-p2=0.025, 10% missing | | | | | | | |
| p1 = 0.3 | 0.158 | 0.158 | 0.158 | | 0.200 | 0.199 | 0.199 |
| p1 = 0.65 | 0.168 | 0.168 | 0.167 | | 0.212 | 0.211 | 0.210 |
| p1 = 0.9 | 0.110 | 0.111 | 0.112 | | 0.143 | 0.143 | 0.147 |
| n100; p1-p2=0.1, 30% missing | | | | | | | |
| p1 = 0.3 | 0.237 | 0.236 | 0.236 | | 0.252 | 0.251 | 0.251 |
| p1 = 0.65 | 0.269 | 0.266 | 0.264 | | 0.285 | 0.283 | 0.280 |
| p1 = 0.9 | 0.195 | 0.197 | 0.198 | | 0.209 | 0.210 | 0.213 |
| n250; p1-p2=0.1, 30% missing | | | | | | | |
| p1 = 0.3 | 0.150 | 0.150 | 0.150 | | 0.160 | 0.160 | 0.160 |
| p1 = 0.65 | 0.171 | 0.170 | 0.169 | | 0.181 | 0.180 | 0.180 |
| p1 = 0.9 | 0.124 | 0.124 | 0.125 | | 0.132 | 0.132 | 0.133 |
| n100; p1-p2=0.1, 10% missing | | | | | | | |
| p1 = 0.3 | 0.237 | 0.236 | 0.236 | | 0.301 | 0.298 | 0.299 |
| p1 = 0.65 | 0.269 | 0.266 | 0.264 | | 0.336 | 0.332 | 0.328 |
| p1 = 0.9 | 0.150 | 0.150 | 0.150 | | 0.190 | 0.189 | 0.190 |
| n250; p1-p2=0.1, 10% missing | | | | | | | |
| p1 = 0.3 | 0.150 | 0.150 | 0.150 | | 0.190 | 0.189 | 0.190 |
| p1 = 0.65 | 0.170 | 0.170 | 0.169 | | 0.215 | 0.214 | 0.213 |
| p1 = 0.9 | 0.124 | 0.124 | 0.124 | | 0.158 | 0.158 | 0.161 |

a Wald b Agresti-Caffo c Newcombe-Wilson; * Complete data † Multiple Imputation

Table 3. Length of confidence intervals for the difference between proportions of the Wald, Agresti-Caffo and Newcombe-Wilson methods in complete data and after Multiple Imputation of 10% and 30% missing MAR data when x and Y have a strong correlation.

|  | Wald*a | AC*b | NW*c | MI-Wald†a | MI-AC†b | MI-NW†c |
| --- | --- | --- | --- | --- | --- | --- |
| n100; p1-p2=0.025, 30% missing | | | | | | |
| p1 = 0.3 | 0.249 | 0.248 | 0.247 | 0.261 | 0.260 | 0.259 |
| p1 = 0.65 | 0.265 | 0.263 | 0.261 | 0.278 | 0.276 | 0.274 |
| p1 = 0.9 | 0.174 | 0.177 | 0.180 | 0.185 | 0.188 | 0.193 |
| n250; p1-p2=0.025, 30% missing | | | | | | |
| p1 = 0.3 | 0.158 | 0.158 | 0.158 | 0.166 | 0.165 | 0.165 |
| p1 = 0.65 | 0.168 | 0.168 | 0.167 | 0.177 | 0.176 | 0.176 |
| p1 = 0.9 | 0.110 | 0.111 | 0.112 | 0.117 | 0.118 | 0.120 |
| n100; p1-p2=0.025, 10% missing | | | | | | |
| p1 = 0.3 | 0.249 | 0.248 | 0.247 | 0.293 | 0.290 | 0.289 |
| p1 = 0.65 | 0.265 | 0.263 | 0.261 | 0.313 | 0.310 | 0.307 |
| p1 = 0.9 | 0.173 | 0.177 | 0.180 | 0.217 | 0.218 | 0.229 |
| n250; p1-p2=0.025, 10% missing | | | | | | |
| p1 = 0.3 | 0.158 | 0.158 | 0.158 | 0.185 | 0.184 | 0.184 |
| p1 = 0.65 | 0.168 | 0.168 | 0.167 | 0.199 | 0.199 | 0.198 |
| p1 = 0.9 | 0.110 | 0.111 | 0.112 | 0.136 | 0.136 | 0.139 |
| n100; p1-p2=0.1, 30% missing | | | | | | |
| p1 = 0.3 | 0.237 | 0.236 | 0.236 | 0.248 | 0.247 | 0.247 |
| p1 = 0.65 | 0.269 | 0.266 | 0.264 | 0.282 | 0.279 | 0.277 |
| p1 = 0.9 | 0.195 | 0.197 | 0.198 | 0.207 | 0.208 | 0.211 |
| n250; p1-p2=0.1, 30% missing | | | | | | |
| p1 = 0.3 | 0.150 | 0.150 | 0.150 | 0.158 | 0.157 | 0.157 |
| p1 = 0.65 | 0.170 | 0.170 | 0.169 | 0.179 | 0.178 | 0.178 |
| p1 = 0.9 | 0.124 | 0.124 | 0.125 | 0.131 | 0.131 | 0.132 |
| n100; p1-p2=0.1, 10% missing | | | | | | |
| p1 = 0.3 | 0.237 | 0.236 | 0.236 | 0.279 | 0.277 | 0.277 |
| p1 = 0.65 | 0.269 | 0.266 | 0.264 | 0.317 | 0.313 | 0.310 |
| p1 = 0.9 | 0.195 | 0.197 | 0.198 | 0.239 | 0.239 | 0.246 |
| n250; p1-p2=0.1, 10% missing | | | | | | |
| p1 = 0.3 | 0.151 | 0.150 | 0.150 | 0.176 | 0.176 | 0.176 |
| p1 = 0.65 | 0.170 | 0.170 | 0.169 | 0.201 | 0.200 | 0.200 |
| p1 = 0.9 | 0.124 | 0.124 | 0.125 | 0.150 | 0.150 | 0.152 |

a Wald b Agresti-Caffo c Newcombe-Wilson; * Complete data † Multiple Imputation
